# Supplementary material
Source: PubMed Central journal article supplement (PMC6180668)
Supplement: BrethelHaurwitzSupplementalMaterial.pdf [file BrethelHaurwitzSupplementalMaterial.pdf]

## **Supplementary Material**

Extraordinary altruists exhibit enhanced self-other overlap in neural responses to distress

Kristin M. Brethel-Haurwitz<sup>1\*</sup>, Elise M. Cardinale<sup>2</sup>, Kruti M. Vekaria<sup>2</sup>, Emily L. Robertson<sup>3</sup>,  
Brian Walitt<sup>4</sup>, John W. VanMeter<sup>5</sup>, & Abigail A. Marsh<sup>2</sup>

<sup>1</sup>Department of Psychology, University of Pennsylvania, Philadelphia, PA 19104.

<sup>2</sup>Department of Psychology, Georgetown University, Washington DC 20057.

<sup>3</sup>Department of Psychology, Louisiana State University, Baton Rouge LA 70803.

<sup>4</sup>National Institute of Nursing Research, National Institutes of Health, Bethesda MD 20892.

<sup>5</sup>Department of Neurology, Georgetown University Medical Center, Washington DC 20057.

\*Correspondence to: kbreth@sas.upenn.edu.

### **Supplementary Material includes:**

Supplementary Methods

Supplementary References

Figures S1-S3

Tables S1-S6

## Supplementary Methods

### Neuroimaging Acquisition

MR images were acquired with a 3T Siemens Tim Trio scanner (Siemens Medical Solutions) and a 12-channel phased-array head coil. Functional data were collected using a T2\*-weighted echo-planar imaging sequence (46 3.0 mm transversal slices;  $64 \times 64$  matrix; repetition time, 2,500 ms; echo time, 30 ms; field of view,  $192 \text{ mm}^2$ ;  $3.0 \times 3.0 \times 3.0 \text{ mm}$  voxels). The first four volumes of each functional run were excluded from analysis to account for magnet stabilization. High-resolution T1-weighted anatomical images were also acquired (3D Magnetization Prepared Rapid Acquisition Gradient Echo; 176 1.0-mm axial slices; field of view,  $250 \text{ mm}^2$ ; repetition time, 1,900 ms; echo time, 2.52 ms;  $246 \times 256$  matrix).

### Analysis of Neuroimaging Data

Functional data were preprocessed and analyzed according to the general linear model, using Analysis of Functional NeuroImages (AFNI) (Cox, 1996). The three runs of the task were concatenated, despiked, motion-corrected, and spatially smoothed using a 6 mm full-width half maximum Gaussian filter. TRs with greater than 0.5 mm frame displacement were censored during preprocessing. Functional data were aligned to the anatomical grid, linearly transformed to a Talairach space template (the detailed TT\_N27 template created from 27 scans of one individual), and masked with an extents mask to account for motion artifacts and to exclude voxels without valid data at every TR for every run, helping to control for false activations. Twelve regressors were created to model the anticipation and stimulation portions of each run, resulting in the following four regressors for each run: threat (cue indicates potential pain), no threat (safety cue), pain (stimulation), no pain (no stimulation). For each participant, contrasts

were also calculated for pain (pain > no pain) and threat (threat > no threat) for each run. Rest was modeled implicitly; baseline was modeled by a first-order function, and motion artifacts were modeled using the six estimated rigid-body motion parameters. Boxcar regressors representing the occurrence of each block type were convolved with a canonical hemodynamic response function, scaled to an amplitude of 1.

Group-level analyses were limited to a brain mask defined by voxels with functional activation shared by at least 50% of participants. Cluster size thresholds were calculated for a corrected clusterwise  $p$  threshold of .05, at uncorrected  $p = .001$ , for this group mask for each comparison using 10,000 Monte Carlo simulations conducted in conjunction with 3dttest++ (via the -Clustsim option) in AFNI (October 2016 AFNI version 16.3.03, using a nonparametric randomization approach to generate cluster size thresholds from the residuals of each  $t$  test to decrease risk of false positives (Cox, Chen, Glen, Reynolds, & Taylor, 2017), created in response to Eklund et al. (Eklund, Nichols, & Knutsson, 2016)). MNI coordinates of peak  $z$  statistics within significant clusters are reported. Region labels are reported according to the CA N27 ML atlas (Eickhoff et al., 2005) in AFNI. As noted above, final administered pressure stimulation level was included as a centered covariate in analyses of experienced pain and threat given the significant group difference, to examine group differences due to subjective experience rather than objective pressure stimulation level. The covariate was mean centered across all participants, so as to not artificially remove group differences in this variable.

In order to examine group differences in similarity of neural activation for experienced and empathic pain and threat, conservative conjunction-null analyses (Nichols, Brett, Andersson, Wager, & Poline, 2005) were conducted in which activation maps meeting statistical thresholds in each condition were compared, such that regions of conjunction indicated significant

activation in both conditions independently, an approach that has been utilized in examining similarity between *self* and *other* responses in empathic pain paradigms (e.g., Beckes et al., 2012). Specifically, a mask was created from a thresholded *self pain* > *self no pain* contrast with objective pain level as a covariate of no interest, and this mask was then applied to an *other pain* > *other no pain* contrast, as paired samples *t* tests within each group. Parallel contrasts were conducted for the threat conditions. Analyses were also conducted in which self-reported connectedness with the study partner and immediate family were separately included as covariates of no interest, centered across all participants, in contrasts at the *other* level. Following up on conjunction patterns observed at the group level, covariation analyses were conducted, in which the association between *self* and *other* activation levels in regions of interest were tested via partial correlation controlling for objective pain level, to determine if apparent self-other mapping at the group level in conjunction analyses were supported by individual-level correspondence in neural activation. Regions of interest (ROIs) in bilateral anterior insula (AI) were defined by 5 mm radius spheres centered at coordinates (left AI:  $x = -40$ ,  $y = 22$ ,  $z = 0$ ; right AI:  $x = 39$ ,  $y = 23$ ,  $z = -4$ ) derived from a functional meta-analysis of empathic pain studies (Lamm et al., 2011).

Generalized psychophysiological interaction (gPPI) functional connectivity analyses were conducted in SPM8 (Wellcome Trust Department of Cognitive Neurology) using the generalized PPI toolbox (McLaren, Ries, Xu, & Johnson, 2012). Functional images were slice-time corrected, realigned, coregistered to anatomical scans, normalized to  $2.0 \times 2.0 \times 2.0$  mm voxel size in MNI space using parameters calculated during segmentation of anatomical scans, and smoothed using a 6 mm Gaussian kernel. Task-specific functional connectivity with left AI was estimated using gPPI analysis (McLaren et al., 2012). The AI seed region was the same ROI

sphere used above. The *other* and *self* runs were processed separately, such that functional connectivity in one run was not controlling for the other. A design matrix was created for each participant that included the stimulus time series for each of the four conditions (threat, no threat, pain, no pain) and six motion parameters, which were convolved with a hemodynamic response function to create psychological regressors. Within each condition, examining connectivity during threat experience was holding the other three conditions (no threat, pain, no pain) constant, and was thus specific to threat. Analogous contrasts were conducted for pain experience. Functional connectivity specific to the threat and pain conditions within the *other* run are the focus of the analyses reported here. Functional connectivity results were limited to a set of bilateral *a priori* ROIs for the two conditions (threat: amygdala, hypothalamus, periaqueductal gray, ventromedial prefrontal cortex, insula; pain: anterior cingulate cortex, periaqueductal gray, inferior parietal cortex, insula). All regions were defined using the AAL atlas (Tzourio-Mazoyer et al., 2002), except for the periaqueductal gray and hypothalamus. The periaqueductal gray was defined as two 5 mm radius spheres centered at the average coordinates for left and right activation ( $x = \pm 4$ ,  $y = -29$ ,  $z = -12$ ) from a recent meta-analysis (Linnman, Moulton, Barmettler, Becerra, & Borsook, 2012). The hypothalamus ROI was defined using the Talairach Daemon label (Lancaster et al., 2000) in the WFU PickAtlas Tool (Maldjian, Laurienti, Kraft, & Burdette, 2003). The PickAtlas Tool was used to create all ROI masks. Nonparametric clusterwise inference was computed via the SnPM13 toolbox (<http://warwick.ac.uk/snpm>) in SPM8, at an FWE corrected threshold of  $p = .05$  at an uncorrected  $p = .001$ , using 10,000 permutations. Reported results are from the output of these SnPM simulations. Independent samples *t* tests (altruists > controls) were conducted separately on the threat and pain contrasts to directly

compare group differences in functional connectivity of the left AI during empathic threat and pain. MNI coordinates of peak  $t$  statistics within significant clusters are reported.

Two sets of follow-up control analyses were conducted in order to examine the robustness of our neural results: (1) repetition of analyses excluding 6 altruistic kidney donors who directed their donation to a specific stranger, (2) repetition of analyses in the full sample with the addition of household income and education as binary covariates of no interest, given trends toward group differences in these demographic variables (see Table 1). In the second set of analyses, covariates were mean centered across all participants and included at both the self and other levels of conjunction analyses. In the second set of control analyses, one control was excluded since income was not reported.

## Supplementary References

- Cox, R. W. (1996). AFNI: Software for analysis and visualization of functional magnetic resonance neuroimages. *Computers and Biomedical Research*, 29(3), 162-173.
- Cox, R. W., Chen, G., Glen, D. R., Reynolds, R. C., & Taylor, P. A. (2017). FMRI clustering in AFNI: False positive rates redux. *Brain Connectivity*, 7(3), 152-171.
- Eickhoff, S. B., Stephan, K. E., Mohlberg, H., Grefkes, C., Fink, G. R., Amunts, K., & Zilles, K. (2005). A new SPM toolbox for combining probabilistic cytoarchitectonic maps and functional imaging data. *Neuroimage*, 25(4), 1325-1335.  
doi:10.1016/j.neuroimage.2004.12.034
- Eklund, A., Nichols, T. E., & Knutsson, H. (2016). Cluster failure: Why fMRI inferences for spatial extent have inflated false-positive rates. *Proceedings of the National Academy of Sciences*, 113(28), 7900-7905. doi: 10.1073/pnas.1602413113
- Lancaster, J. L., Woldorff, M. G., Parsons, L. M., Liotti, M., Freitas, C. S., Rainey, L., . . . Fox, P. T. (2000). Automated Talairach atlas labels for functional brain mapping. *Human Brain Mapping*, 10(3), 120-131. doi:10.1002/1097-0193(200007)10:3%3C120::AID-HBM30%3E3.0.CO;2-8
- Linman, C., Moulton, E. A., Barmettler, G., Becerra, L., & Borsook, D. (2012). Neuroimaging of the periaqueductal gray: State of the field. *Neuroimage*, 60(1), 505-522.  
doi:10.1016/j.neuroimage.2011.11.095
- Maldjian, J. A., Laurienti, P. J., Kraft, R. A., & Burdette, J. H. (2003). An automated method for neuroanatomic and cytoarchitectonic atlas-based interrogation of fMRI data sets. *NeuroImage*, 19(3), 1233-1239. doi:10.1016/S1053-8119(03)00169-1
- McLaren, D. G., Ries, M. L., Xu, G., & Johnson, S. C. (2012). A generalized form of context-

dependent psychophysiological interactions (gPPI): A comparison to standard approaches.

*Neuroimage*, 61(4), 1277-1286. doi:10.1016/j.neuroimage.2012.03.068

Nichols, T., Brett, M., Andersson, J., Wager, T., & Poline, J. B. (2005). Valid conjunction inference with the minimum statistic. *Neuroimage*, 25(3), 653-660.

doi:10.1016/j.neuroimage.2004.12.005

Tzourio-Mazoyer, N., Landeau, B., Papathanassiou, D., Crivello, F., Etard, O., Delcroix, N., . . . Joliot, M. (2002). Automated anatomical labeling of activations in SPM using a macroscopic anatomical parcellation of the MNI MRI single-subject brain. *Neuroimage*, 15(1), 273-289. doi:10.1006/nimg.2001.0978



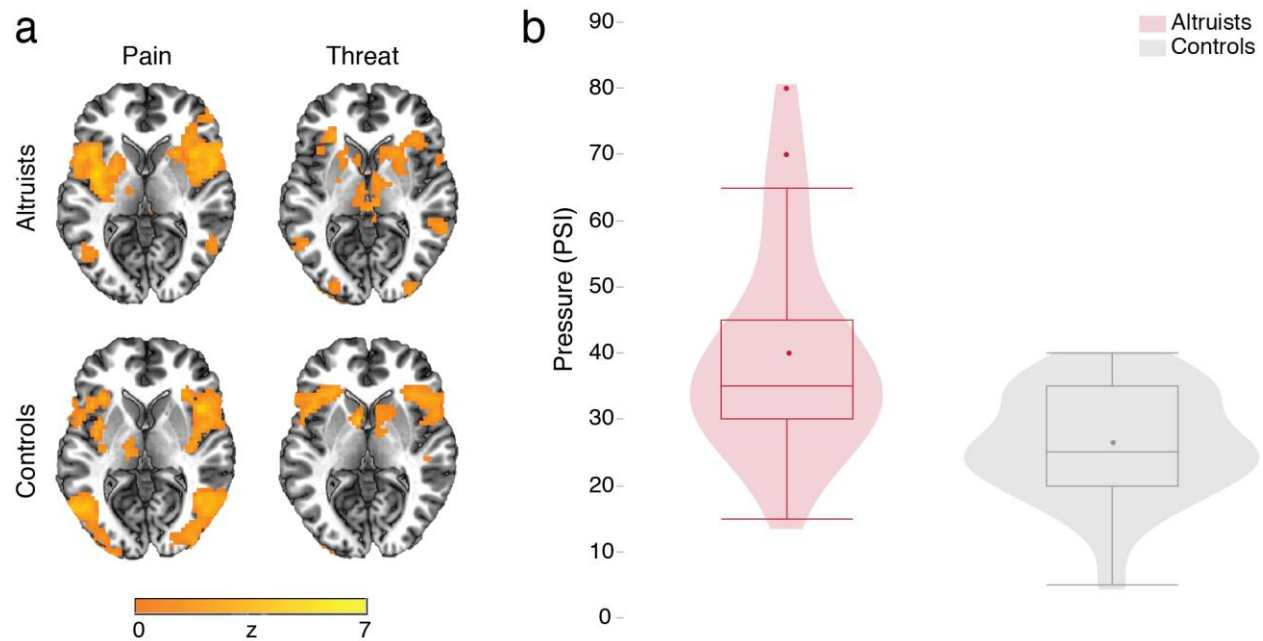

*Figure S1.* Self pain and threat results and pressure stimulation levels. (a) Altruists and controls exhibited similar neural activation for *self pain* > *self no pain* and *self threat* > *self no threat*.  $z = 0$ . Whole-brain clusterwise corrected threshold  $p < .05$  at uncorrected voxelwise threshold  $p = .001$  (b) Final subjective “slightly intense” pain level selected by each group. Altruists selected a significantly higher pressure level than controls,  $t(50) = 3.97$ ,  $p < .001$ ,  $d = 1.10$  [95% CI: 0.51-1.68]. Contours represent frequency distributions. Boxplots are displayed with dots representing means and outliers.

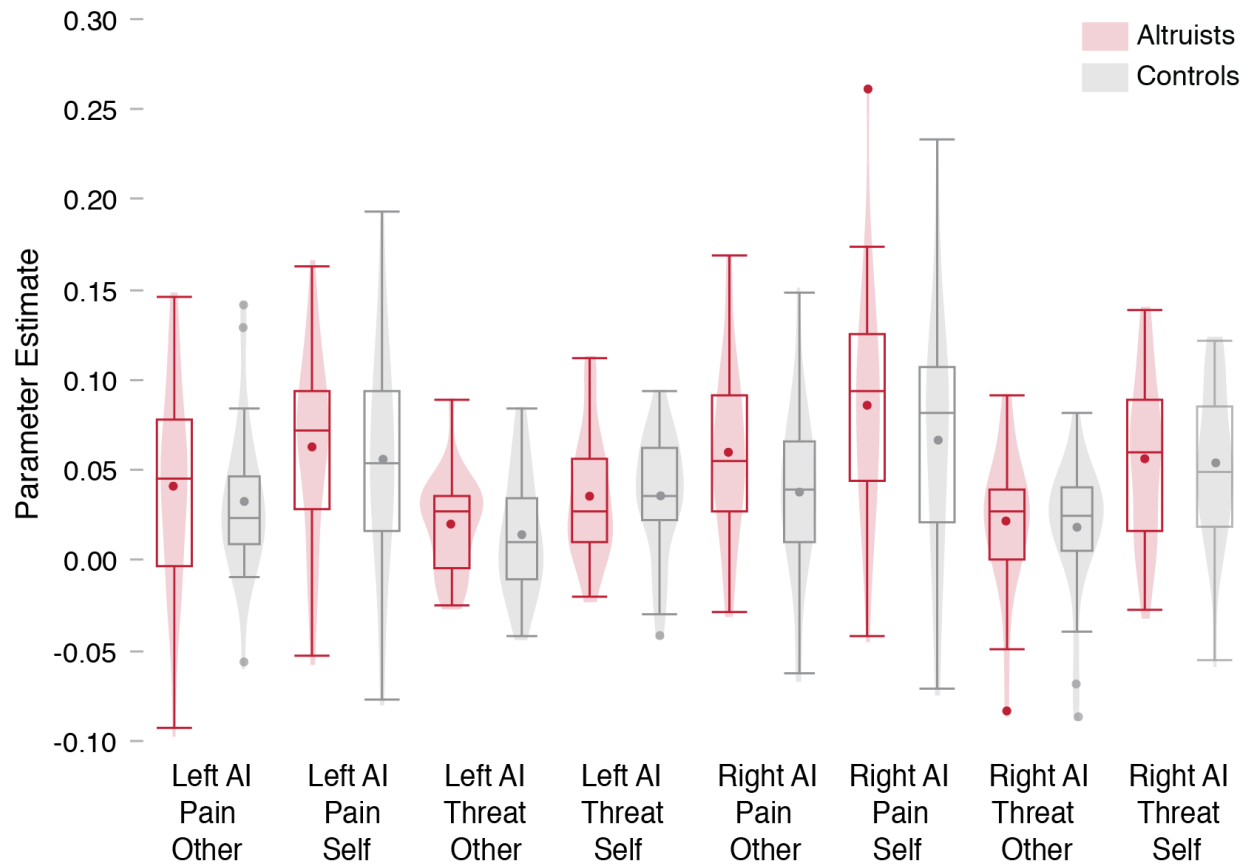

Figure S2. Parameter estimates for mean activation in left and right anterior insula (AI) ROIs.

Contours represent frequency distributions. Boxplots are displayed with dots representing means and outliers. Parameter estimates for pain and threat are relative to condition-specific baselines (pain > no pain, threat > no threat). There were no group differences in activation for any AI ROI, all  $p > .05$ , all  $d < 0.48$ . Across all participants, *self* pain resulted in higher activation than *other* pain in left AI,  $t(51) = 2.39$ ,  $p = .020$ ,  $d = 0.41$ , and right AI,  $t(51) = 2.79$ ,  $p = .007$ ,  $d = 0.47$ , and *self* threat resulted in higher activation than *other* threat in left AI,  $t(51) = 3.11$ ,  $p = .003$ ,  $d = 0.59$ , and right AI,  $t(51) = 4.92$ ,  $p < .001$ ,  $d = 0.87$ . However, pain activation was higher than threat activation for the *self* in left AI,  $t(51) = 3.39$ ,  $p = .001$ ,  $d = 0.49$ , and right AI,  $t(51) = 2.20$ ,  $p = .033$ ,  $d = 0.37$ , and pain activation was also higher than threat activation for *other* in left AI,  $t(51) = 2.41$ ,  $p = .020$ ,  $d = 0.49$ , and right AI,  $t(51) = 3.71$ ,  $p = .001$ ,  $d = 0.69$ .

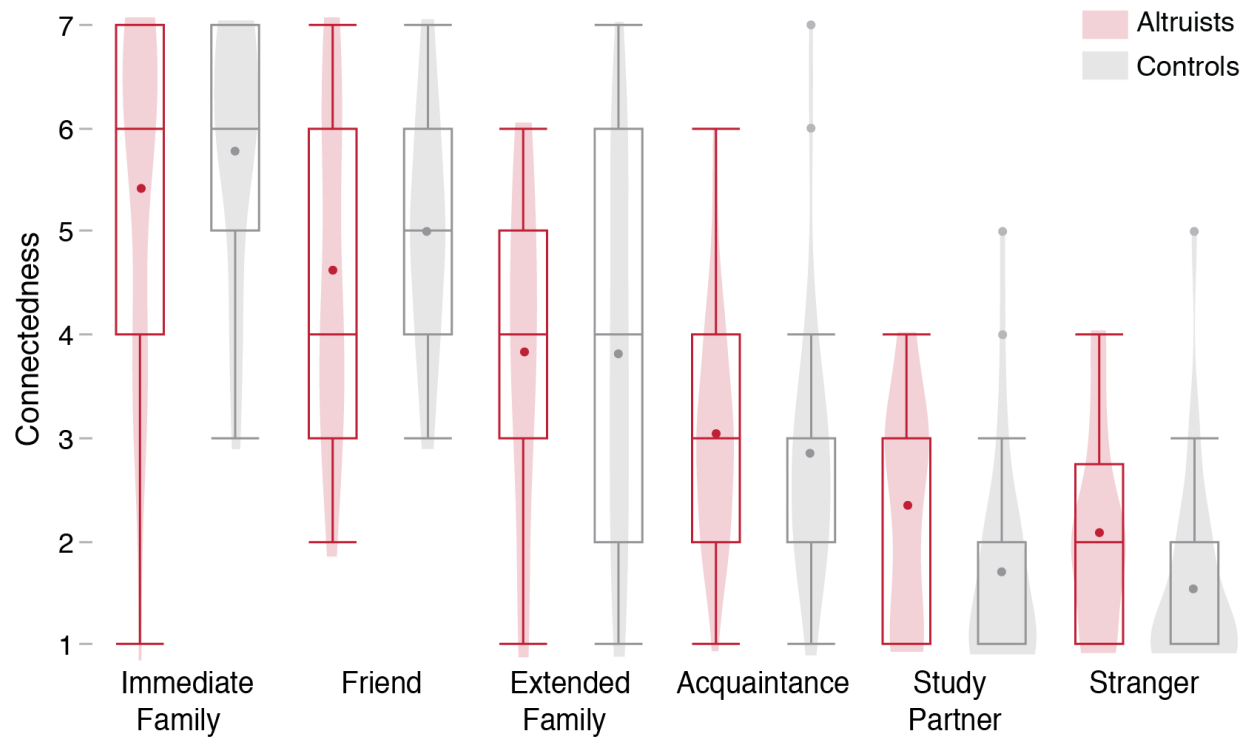

Figure S3. Perceptions of connectedness as rated on the Inclusion of Other in the Self Scale.

Contours represent frequency distributions. Boxplots are displayed with dots representing means and outliers. Altruists rated greater connectedness for the study partner and strangers in general, both  $p \leq .05$ , both  $d > 0.56$ .

Table S1

*Correlations between Connectedness, Self-Reported Empathy, and Activation in Bilateral Anterior Insula ROIs in Each Group*

|           | IoS<br>Study<br>Partner        | IRI<br>Empathic<br>Concern | EPS<br>Empathic<br>Concern | L AI<br>Pain<br>Self | R AI<br>Pain<br>Self | L AI<br>Fear<br>Self | R AI<br>Fear<br>Self | L AI<br>Pain<br>Other | R AI<br>Pain<br>Other | L AI<br>Fear<br>Other | R AI<br>Fear<br>Other |        |
|-----------|--------------------------------|----------------------------|----------------------------|----------------------|----------------------|----------------------|----------------------|-----------------------|-----------------------|-----------------------|-----------------------|--------|
| Altruists | IoS Stranger <sup>a</sup>      | .70**† <sup>b</sup>        | .60**†                     | .58**†               | -.18                 | -.20                 | -.23                 | .04                   | -.38                  | -.44*                 | .29                   | .28    |
|           | IoS Study Partner <sup>b</sup> |                            | .23                        | .52*                 | .05                  | -.33                 | -.38                 | -.13                  | -.32                  | -.33                  | -.01                  | .32    |
|           | IRI Empathic Concern           |                            |                            | .52**                | .01                  | -.12                 | -.12                 | .01                   | -.16                  | -.20                  | .41*                  | .47*   |
|           | EPS Empathic Concern           |                            |                            |                      | -.25                 | -.35                 | -.37                 | -.19                  | -.23                  | -.36                  | .13                   | .31    |
|           | L AI Pain Self                 |                            |                            |                      |                      | .49*                 | .39                  | .24                   | .57**†                | .52**                 | -.23                  | .06    |
|           | R AI Pain Self                 |                            |                            |                      |                      |                      | .27                  | .22                   | .38                   | .29                   | -.33                  | -.50*  |
|           | L AI Fear Self                 |                            |                            |                      |                      |                      |                      | .79**†                | .26                   | .46*                  | .28                   | -.12   |
|           | R AI Fear Self                 |                            |                            |                      |                      |                      |                      |                       | .13                   | .40*                  | .21                   | -.02   |
|           | L AI Pain Other                |                            |                            |                      |                      |                      |                      |                       |                       | .74**†                | -.19                  | .10    |
|           | R AI Pain Other                |                            |                            |                      |                      |                      |                      |                       |                       |                       | -.12                  | .14    |
|           | L AI Fear Other                |                            |                            |                      |                      |                      |                      |                       |                       |                       |                       | .56**† |
| Controls  | IoS Stranger <sup>c</sup>      | .78**†                     | .18                        | .40*                 | .32                  | .22                  | .38                  | .38                   | -.02                  | .08                   | .30                   | .30    |
|           | IoS Study Partner              |                            | .34                        | .44*                 | .25                  | .26                  | .27                  | .31                   | -.13                  | .05                   | .37                   | .43*   |
|           | IRI Empathic Concern           |                            |                            | .61**†               | -.15                 | .10                  | -.19                 | .02                   | .26                   | .50**                 | .20                   | .12    |
|           | EPS Empathic Concern           |                            |                            |                      | -.03                 | .07                  | -.10                 | -.08                  | .33                   | .36                   | .09                   | .13    |
|           | L AI Pain Self                 |                            |                            |                      |                      | .42*                 | .56**†               | .22                   | -.23                  | -.10                  | .04                   | .20    |
|           | R AI Pain Self                 |                            |                            |                      |                      |                      | .11                  | .38*                  | .15                   | .21                   | .19                   | .31    |
|           | L AI Fear Self                 |                            |                            |                      |                      |                      |                      | .55**†                | -.29                  | -.11                  | -.02                  | .33    |
|           | R AI Fear Self                 |                            |                            |                      |                      |                      |                      |                       | .07                   | .12                   | .28                   | .39*   |
|           | L AI Pain Other                |                            |                            |                      |                      |                      |                      |                       |                       | .80**†                | .05                   | .01    |
|           | R AI Pain Other                |                            |                            |                      |                      |                      |                      |                       |                       |                       | .14                   | .16    |
|           | L AI Fear Other                |                            |                            |                      |                      |                      |                      |                       |                       |                       |                       | .58**† |

*Note.* Altruist N = 25, Control N = 27, unless otherwise noted. ROI = region of interest. IoS = Inclusion of Other in Self. IRI = Interpersonal Reactivity Index. EPS = Empathy for Pain Scale. L = left. R = right. AI = anterior insula.

<sup>a</sup>N = 24. <sup>b</sup>N = 23. <sup>c</sup>N = 26.

\* $p < .05$ . \*\* $p < .01$ . † $Q < .05$  per Benjamini-Hochberg procedure for 66 tests within each group.

Table S2

*Regions of Significant Activation for Other Pain > Other No Pain, Masked by Self Pain > Self No Pain, in Each Group*

| Altruists      |        |        |        |            |                                |
|----------------|--------|--------|--------|------------|--------------------------------|
| k <sup>a</sup> | Peak x | Peak y | Peak z | Peak z(24) | Peak Region                    |
| 319            | 56     | 21     | 3      | 6.09       | Right Inferior Frontal Gyrus   |
| 290            | -62    | -30    | 45     | 6.05       | Left Inferior Parietal Lobule  |
| 286            | 66     | -38    | 24     | 6.42       | Right Supramarginal Gyrus      |
| 234            | -49    | -74    | -4     | 6.76       | Left Inferior Occipital Gyrus  |
| 150            | 50     | -59    | -5     | 6.20       | Right Inferior Temporal Gyrus  |
| 46             | -46    | 13     | 17     | 4.59       | Left Inferior Frontal Gyrus    |
| 43             | 47     | 9      | 56     | 5.78       | Right Middle Frontal Gyrus     |
| 42             | -40    | 17     | 0      | 4.65       | Left Insula                    |
| 33             | 50     | 48     | 5      | 4.44       | Right Middle Frontal Gyrus     |
| 28             | -24    | -65    | -48    | 4.18       | Left Cerebellum                |
| 27             | 31     | -46    | 42     | 4.97       | Right Inferior Parietal Lobule |
| 21             | -30    | -16    | -1     | 4.70       | Left Putamen                   |
| 17             | 8      | 9      | 52     | 4.94       | Right Supplementary Motor Area |
| 15             | -11    | -8     | 9      | 4.11       | Left Thalamus                  |
| 11             | 12     | -8     | 12     | 3.82       | Right Thalamus                 |
| 10             | -8     | -24    | 37     | 4.03       | Left Middle Cingulate Cortex   |
| 9              | -24    | 1      | -13    | 4.52       | Left Putamen                   |
| Controls       |        |        |        |            |                                |
| k <sup>b</sup> | Peak x | Peak y | Peak z | Peak z(26) | Peak Region                    |
| 961            | 53     | -68    | -1     | 7.03       | Right Middle Temporal Gyrus    |
| 715            | -56    | -24    | 41     | 6.33       | Left Inferior Parietal Lobule  |
| 710            | -46    | -71    | -1     | 6.77       | Left Middle Occipital Gyrus    |
| 615            | 56     | -21    | 37     | 6.37       | Right Postcentral Gyrus        |
| 238            | 53     | 11     | 35     | 5.95       | Right Precentral Gyrus         |
| 134            | -4     | -80    | -41    | 4.77       | Left Cerebellum                |
| 29             | -53    | 10     | 28     | 5.44       | Left Inferior Frontal Gyrus    |
| 26             | 43     | 2      | -3     | 4.51       | Right Insula                   |
| 19             | 24     | -54    | 63     | 4.45       | Right Superior Parietal Lobule |
| 15             | 12     | -74    | -44    | 5.63       | Right Cerebellum               |

<sup>a</sup>Cluster extent for clusterwise corrected threshold  $p < .05$  at uncorrected  $p = .001 = 8$  voxels

<sup>b</sup>Cluster extent for clusterwise corrected threshold  $p < .05$  at uncorrected  $p = .001 = 10$  voxels

Table S3

*Regions of Significant Activation for Other Threat > Other No Threat, Masked by Self Threat > Self No Threat, in Each Group*

| Altruists      |        |        |        |            |                               |
|----------------|--------|--------|--------|------------|-------------------------------|
| k <sup>a</sup> | Peak x | Peak y | Peak z | Peak z(24) | Peak Region                   |
| 28             | -30    | 23     | -11    | 4.47       | Left Inferior Frontal Gyrus   |
| 20             | 2      | 24     | 55     | 4.84       | Left Supplementary Motor Area |
| 19             | -56    | -47    | 25     | 4.72       | Left Supramarginal Gyrus      |
| 18             | 34     | -96    | 4      | 4.02       | Right Middle Occipital Gyrus  |
| 16             | 31     | 26     | -4     | 3.96       | Right Insula                  |
| 15             | -20    | -96    | -3     | 3.73       | Left Middle Occipital Gyrus   |
| 5              | 2      | 44     | 36     | 4.15       | Left Superior Medial Gyrus    |
| Controls       |        |        |        |            |                               |
| k <sup>b</sup> | Peak x | Peak y | Peak z | Peak z(26) | Peak Region                   |
| 16             | 50     | 24     | 3      | 4.31       | Right Inferior Frontal Gyrus  |
| 14             | -33    | -96    | 1      | 3.92       | Left Middle Occipital Gyrus   |
| 12             | 31     | 32     | -5     | 3.64       | Right Inferior Frontal Gyrus  |
| 10             | -59    | -21    | 30     | 3.92       | Left Postcentral Gyrus        |
| 7              | 8      | 9      | 11     | 3.99       | Right Caudate Nucleus         |
| 7              | 59     | -47    | 25     | 3.90       | Right Supramarginal Gyrus     |
| 4              | -27    | -87    | -7     | 3.56       | Left Inferior Occipital Gyrus |
| 4              | -33    | -40    | 42     | 3.57       | Left Inferior Parietal Lobule |
| 4              | -43    | -45    | 56     | 4.05       | Left Inferior Parietal Lobule |

<sup>a</sup>Cluster extent for clusterwise corrected threshold  $p < .05$  at uncorrected  $p = .001 = 5$  voxels

<sup>b</sup>Cluster extent for clusterwise corrected threshold  $p < .05$  at uncorrected  $p = .001 = 4$  voxels

Table S4

*Regions of Significant Activation for Self Pain > Self No Pain in Each Group*

| Altruists      |        |        |        |            |                                |
|----------------|--------|--------|--------|------------|--------------------------------|
| k <sup>a</sup> | Peak x | Peak y | Peak z | Peak z(23) | Peak Region                    |
| 1557           | -40    | -2     | -2     | 5.97       | Left Insula                    |
| 940            | 37     | 6      | 4      | 5.77       | Right Insula                   |
| 469            | 62     | -34    | 34     | 5.88       | Right Supramarginal Gyrus      |
| 351            | 28     | -51    | -26    | 5.34       | Right Cerebellum               |
| 334            | -1     | 8      | 42     | 5.64       | Left Middle Cingulate Cortex   |
| 285            | -30    | -63    | -25    | 5.22       | Left Cerebellum                |
| 179            | -4     | 25     | -14    | -4.33      | Left Middle Orbital Gyrus      |
| 59             | 8      | -32    | 65     | -4.12      | Right Paracentral Lobule       |
| 45             | 8      | -13    | -5     | 5.00       | Right Thalamus                 |
| 40             | -14    | -27    | 37     | 4.58       | Left Middle Cingulate Cortex   |
| 36             | -20    | -71    | -51    | 4.85       | Left Cerebellum                |
| 32             | 34     | -40    | 42     | 4.13       | Right Supramarginal Gyrus      |
| Controls       |        |        |        |            |                                |
| k <sup>b</sup> | Peak x | Peak y | Peak z | Peak z(25) | Peak Region                    |
| 1644           | -53    | -24    | 41     | 6.34       | Left Inferior Parietal Lobule  |
| 1303           | -59    | -64    | 9      | 5.44       | Left Middle Temporal Gyrus     |
| 1157           | 28     | -88    | -10    | 5.34       | Right Inferior Occipital Gyrus |
| 946            | 56     | -26    | 20     | 6.30       | Right Rolandic Operculum       |
| 736            | 53     | 15     | 10     | 6.08       | Right Inferior Frontal Gyrus   |
| 376            | 5      | 8      | 35     | 5.16       | Right Middle Cingulate Cortex  |
| 264            | -56    | 20     | -11    | 5.74       | Left Temporal Pole             |
| 37             | 8      | -32    | 69     | -4.57      | Right Paracentral Lobule       |
| 35             | -33    | 43     | 15     | 4.11       | Left Middle Frontal Gyrus      |

<sup>a</sup>Cluster extent for clusterwise corrected threshold  $p < .05$  at uncorrected  $p = .001 = 27$  voxels<sup>b</sup>Cluster extent for clusterwise corrected threshold  $p < .05$  at uncorrected  $p = .001 = 30$  voxels

Table S5

*Regions of Significant Activation for Self Threat > Self No Threat in Each Group*

| Altruists      |        |        |        |            |                                |
|----------------|--------|--------|--------|------------|--------------------------------|
| k <sup>a</sup> | Peak x | Peak y | Peak z | Peak z(23) | Peak Region                    |
| 836            | 18     | 12     | 11     | 5.25       | Right Caudate Nucleus          |
| 359            | -1     | 33     | 51     | 5.45       | Left Superior Medial Gyrus     |
| 278            | 43     | 2      | 49     | 4.54       | Right Precentral Gyrus         |
| 202            | -30    | -90    | -3     | 4.71       | Left Middle Occipital Gyrus    |
| 188            | -56    | -47    | 32     | 4.70       | Left Supramarginal Gyrus       |
| 155            | 66     | -44    | 28     | 4.73       | Right Supramarginal Gyrus      |
| 126            | 28     | -93    | -3     | 5.41       | Right Inferior Occipital Gyrus |
| 101            | -1     | -54    | -32    | 4.23       | Cerebellar Vermis              |
| 74             | -27    | 29     | -4     | 4.81       | Left Insula                    |
| 47             | -53    | -58    | 8      | 4.55       | Left Middle Temporal Gyrus     |
| 46             | 59     | -46    | 1      | 4.42       | Right Middle Temporal Gyrus    |
| 45             | 43     | -64    | -28    | 4.28       | Right Cerebellum               |
| Controls       |        |        |        |            |                                |
| k <sup>b</sup> | Peak x | Peak y | Peak z | Peak z(25) | Peak Region                    |
| 323            | 47     | 23     | -11    | 5.44       | Right Inferior Frontal Gyrus   |
| 290            | -30    | 26     | -8     | 5.07       | Left Insula                    |
| 260            | -59    | -21    | 37     | 4.97       | Left Supramarginal Gyrus       |
| 220            | 2      | 18     | 55     | 4.63       | Right Supplementary Motor Area |
| 143            | 12     | 9      | 11     | 5.44       | Right Caudate Nucleus          |
| 142            | -24    | -94    | -6     | 4.62       | Left Inferior Occipital Gyrus  |
| 131            | 53     | -25    | 24     | 5.56       | Right Rolandic Operculum       |
| 99             | -8     | 8      | 0      | 5.52       | Left Caudate Nucleus           |
| 59             | 43     | 5      | 46     | 4.67       | Right Precentral Gyrus         |
| 52             | -46    | 5      | 46     | 4.31       | Left Precentral Gyrus          |
| 32             | 53     | -27    | -7     | 4.62       | Right Middle Temporal Gyrus    |

<sup>a</sup>Cluster extent for clusterwise corrected threshold  $p < .05$  at uncorrected  $p = .001 = 43$  voxels<sup>b</sup>Cluster extent for clusterwise corrected threshold  $p < .05$  at uncorrected  $p = .001 = 29$  voxels



Table S6

*Significant Functional Connectivity with Left AI for Altruists > Controls for Other Pain and Other Threat*

| Other Pain      |        |        |        |                    |               |
|-----------------|--------|--------|--------|--------------------|---------------|
| k <sup>a</sup>  | Peak x | Peak y | Peak z | Peak <i>t</i> (50) | ROI           |
| 18 <sup>b</sup> | -38    | 14     | 0      | 3.88               | Left Insula   |
| 11 <sup>b</sup> | -44    | 4      | 8      | 3.87               | Left Insula   |
| Other Threat    |        |        |        |                    |               |
| k <sup>a</sup>  | Peak x | Peak y | Peak z | Peak <i>t</i> (50) | ROI           |
| 14 <sup>b</sup> | -32    | 20     | -12    | 4.08               | Left Insula   |
| 9 <sup>c</sup>  | -24    | -2     | -16    | 2.98               | Left Amygdala |

<sup>a</sup>2mm<sup>3</sup> voxels

<sup>b</sup>Cluster extent for clusterwise corrected threshold  $p < .05$  at uncorrected  $p = .001 = 8$  voxels

<sup>c</sup>Cluster extent for clusterwise corrected threshold  $p < .05$  at uncorrected  $p = .005 = 3$  voxels
